# Supplementary material for: Structure of Starch–Sepiolite Bio-Nanocomposites: Effect of Processing and Matrix–Filler Interactions
Source: MDPI journal article supplement (doi:10.3390/polym15051207), 2023-02-27
Supplement: s1 [file s1]

# Supplementary Material

## Structure of Starch-Sepiolite Bio-Nanocomposites: Effect of Processing and Matrix-Filler Interactions

Daniele Bugnotti <sup>1</sup>, Sara Dalle Vacche <sup>2,3</sup>, Leandro Hernan Esposito <sup>2</sup>, Emanuela Callone <sup>1</sup>, Sara Fernanda Orsini <sup>4</sup>, Riccardo Ceccato <sup>1</sup>, Massimiliano D'Arienzo <sup>4</sup>, Roberta Bongiovanni <sup>2,3</sup>, Sandra Dirè <sup>1,\*</sup> and Alessandra Vitale <sup>2,3,\*</sup>

<sup>1</sup> University of Trento, Department of Industrial Engineering, 38123 Trento, Italy

<sup>2</sup> Politecnico di Torino, Department of Applied Science and Technology, 10129 Torino, Italy

<sup>3</sup> INSTM – Politecnico di Torino Research Unit, 50121 Firenze, Italy

<sup>4</sup> University of Milano-Bicocca, Department of Materials Science, 20125 Milano, Italy

\* Correspondence: sandra.dire@unitn.it (SD); alessandra.vitale@polito.it (AV)

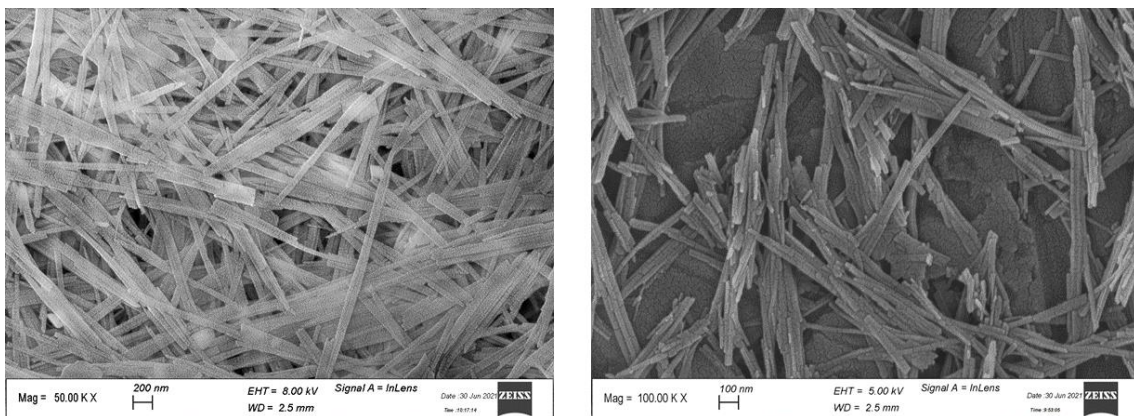

**Figure S1.** SEM images of sepiolite clay filler.

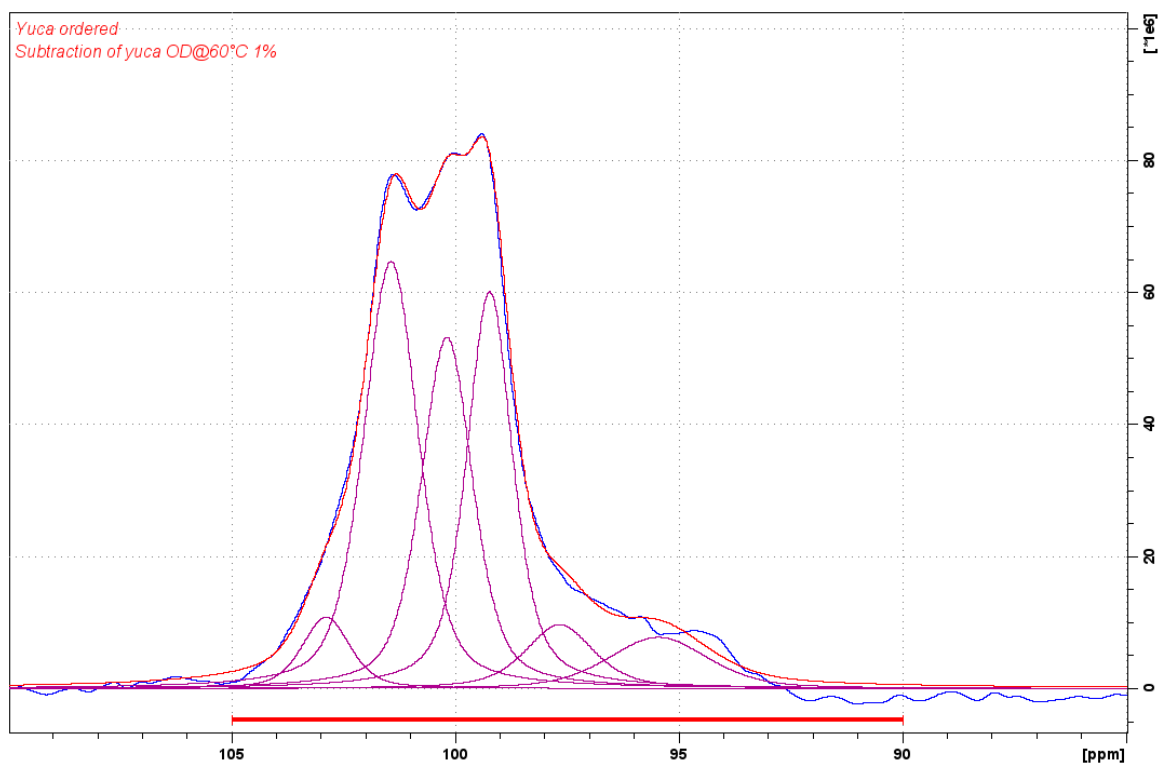

**Figure S2.** Profile fitting of C1 region in  $Y_p$   $^{13}\text{C}$  CPMAS NMR spectrum. Components at 97.7 and 95.5 ppm were attributed to interfacial conformations [1].

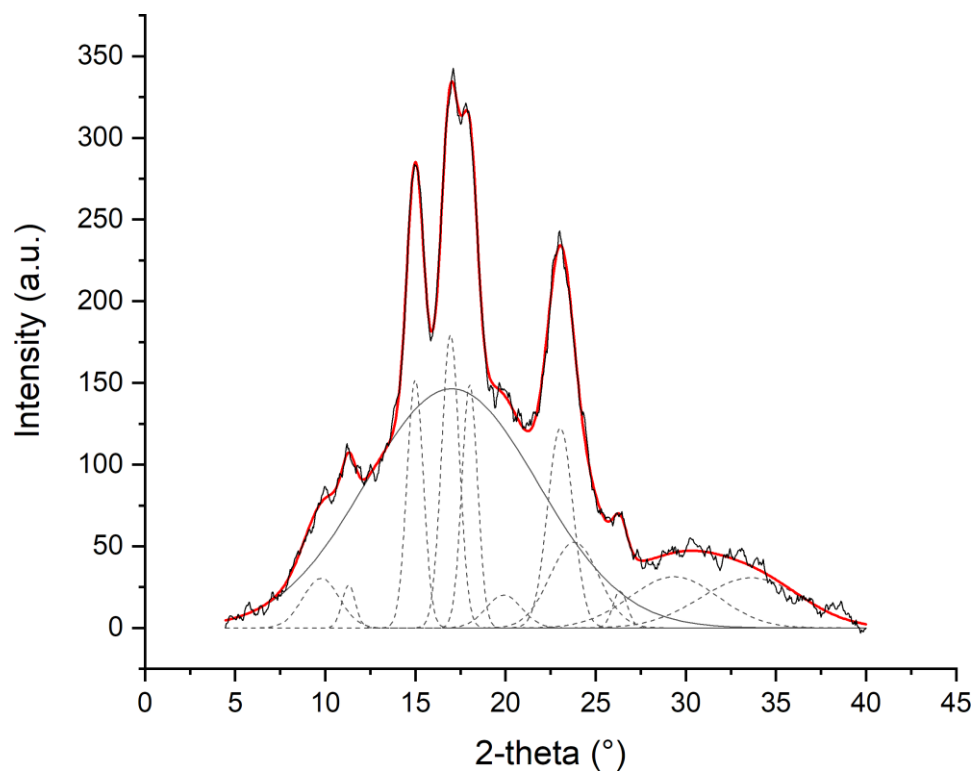

**Figure S3.** Profile fitting of XRD diffractogram of  $Y_p$ . The dashed peaks represent crystalline reflections while the solid line accounts for the amorphous halo.

**Table S1.** Main FTIR-ATR peak assignment of film samples.  $\nu$ =stretching;  $\delta$ =bending.

| Peak      | Assignment                                     | References |
|-----------|------------------------------------------------|------------|
| 3290-3280 | $\nu$ OH                                       | [2]        |
| 2925      | $\nu$ CH <sub>2</sub>                          | [2]        |
| 2884      | $\nu$ CH <sub>2</sub>                          | [2]        |
| 1646      | $\delta$ OH (water scissoring)                 | [2,3]      |
| 1455      | $\delta$ CH <sub>2</sub>                       | [3]        |
| 1335      | $\delta$ COH                                   | [3]        |
| 1240      | CH <sub>2</sub> OH                             | [2,3]      |
| 1150-1103 | $\nu$ CO, $\nu$ CC in COH group                | [4-6]      |
| 1078-926  | $\delta$ COH and CH <sub>2</sub> related modes | [4-6]      |
| 860       | COC, CH deformations                           | [4]        |
| >800      | skeletal vibrations                            | [7]        |

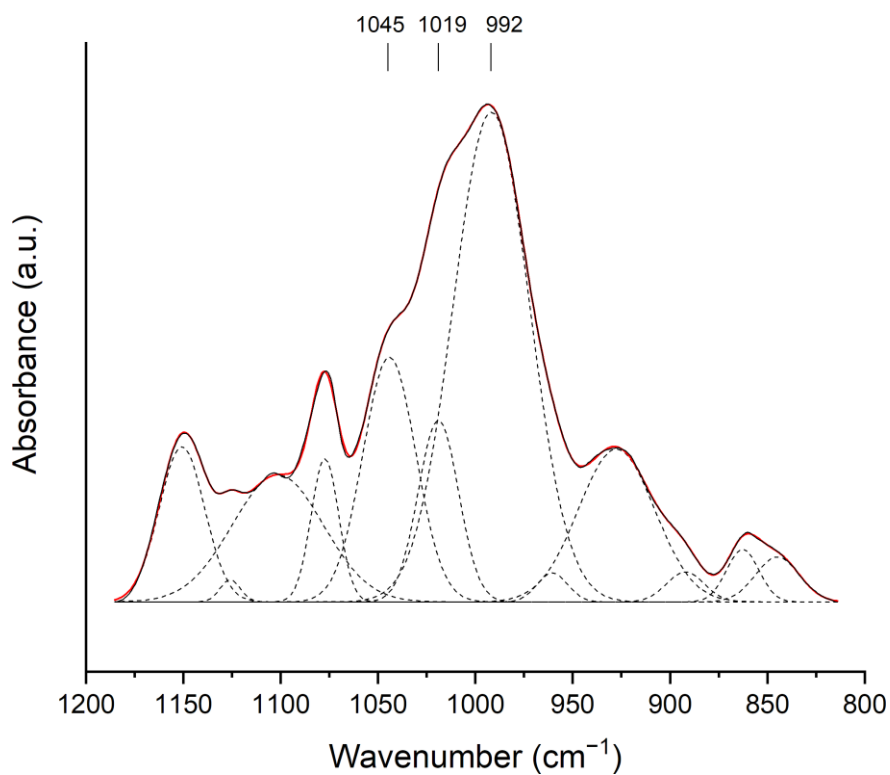

**Figure S4.** Profile fitting of FTIR-ATR 1200-800 cm<sup>-1</sup> region in Y<sub>p</sub>. Peak positions related to crystalline/amorphous regions are labelled.

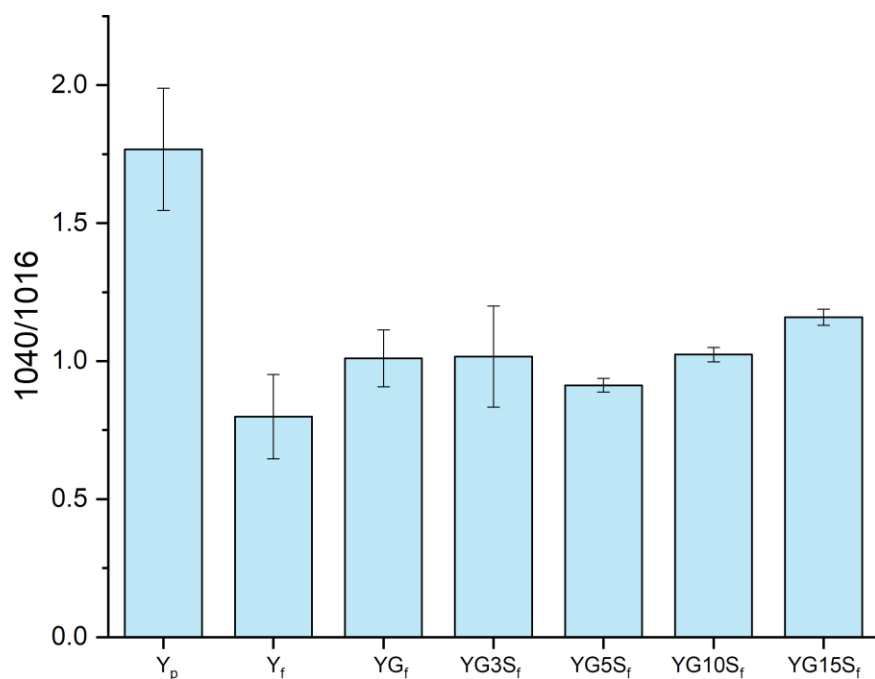

**Figure S5.** Results of FTIR-ATR 1040/1016 peak area ratio for all the samples analyzed.

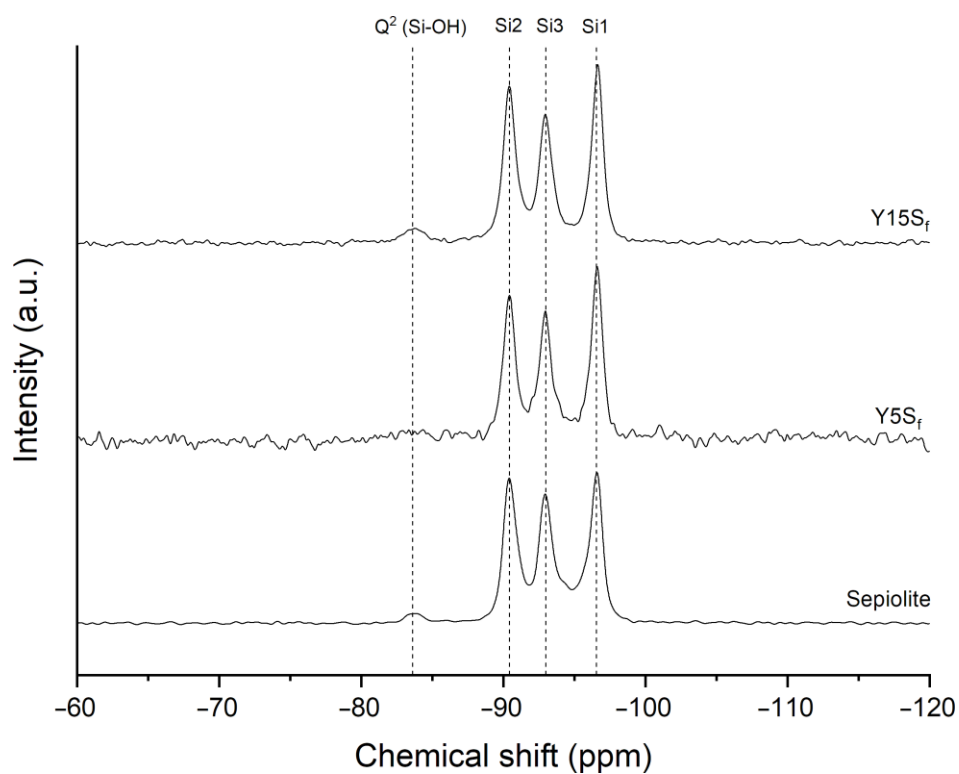

**Figure S6.** <sup>29</sup>Si CPMAS NMR spectra of neat sepiolite in comparison with Y5S<sub>f</sub> and Y15S<sub>f</sub> without glycerol. Intensity peak ratio was similar for the three samples.

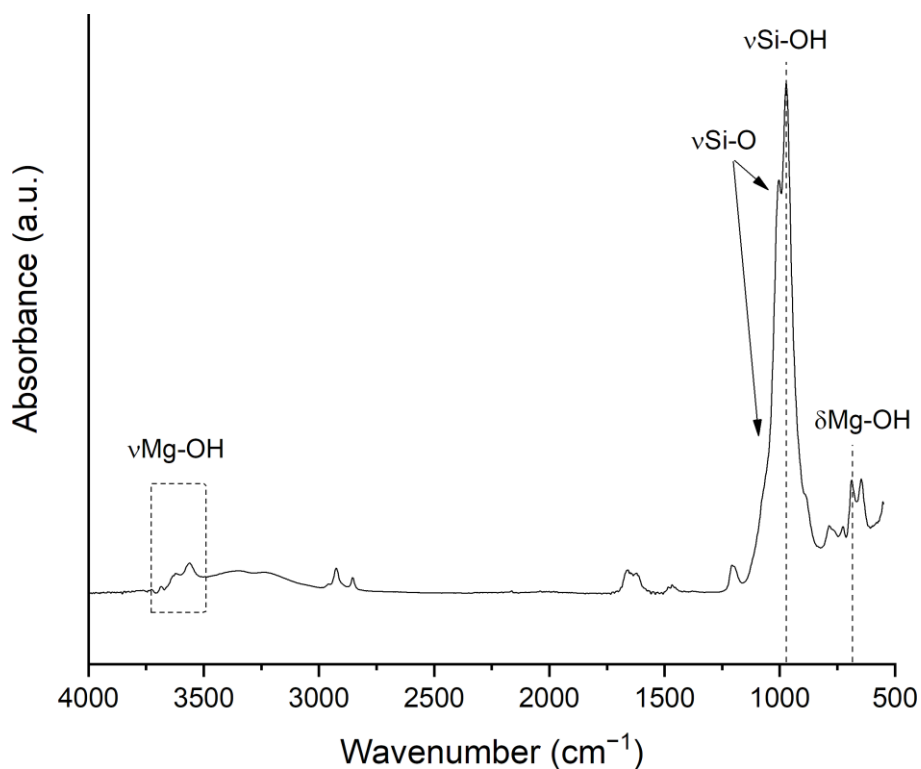

**Figure S7.** FTIR-ATR of sepiolite filler.

## References

1. Mutungi, C.; Passauer, L.; Onyango, C.; Jaros, D.; Rohm, H. Debranched cassava starch crystallinity determination by Raman spectroscopy: Correlation of features in Raman spectra with X-ray diffraction and <sup>13</sup>C CP/MAS NMR spectroscopy. *Carbohydr. Polym.* **2012**, *87*, 598-606.
2. Kizil, R.; Irudayaraj, J.; Seetharaman, K. Characterization of Irradiated Starches by Using FT-Raman and FTIR spectroscopy. *Journal of Agricultural and Food Chemistry* **2002**, 3912-3918.
3. Vicentini, N.M.; Dupuy, N.; Leitzelman, M.; Cereda, M.P.; Sobral, P.J.A. Prediction of Cassava Starch Edible Film Properties by Chemometric Analysis of Infrared Spectra. *Spectroscopy Letters* **2005**, 749-767.
4. van Soest, J.J.G.; Tournois, H.; de Wit, D.; Vliegthart, J.F.G. Short-range structure in (partially) crystalline potato starch determined with attenuated total reflectance Fourier-transform IR spectroscopy. *Carbohydr. Res.* **1995**, 201-214.
5. Warren, F.J.; Gidley, M.J.; Flanagan, B.M. Infrared spectroscopy as a tool to characterise starch ordered structure - a joint FTIR-ATR, NMR, XRD and DSC study. *Carbohydrates Polymers* **2016**, 35-42.
6. Mutungi, C.; Onyango, C.; Doert, T.; Paasch, S.; Thiele, S.; Machill, S.; Jaros, D.; Rohm, H. Long- and short-range structural changes of recrystallised cassava starch subjected to in vitro digestion. *Food Hydrocolloids* **2011**, 477-485.
7. Capron, I.; Robert, P.; Colonna, P.; Brogly, M.; Planchot, V. Starch in rubbery and glassy states by FTIR spectroscopy. *Carbohydr. Polym.* **2007**, 249-259.
